# Supplementary material for: High‐Density Lipoproteins‐Associated Proteins and Subspecies Related to Arterial Stiffness in Young Adults with Type 2 Diabetes Mellitus
Source: Hindawi journal article supplement (doi:10.1155/2018/7514709), 2018-01-01

**Supplemental Figure 1. Correlation of apoA-I relative abundance in fraction 21 versus PWV measurement.** Lean, T2D and combined data are marked with blue, red, and green. The PCC of combined data and PWV appear to be mainly driven by lean group so that it fails to reflect the relationship between PWV and proteins.

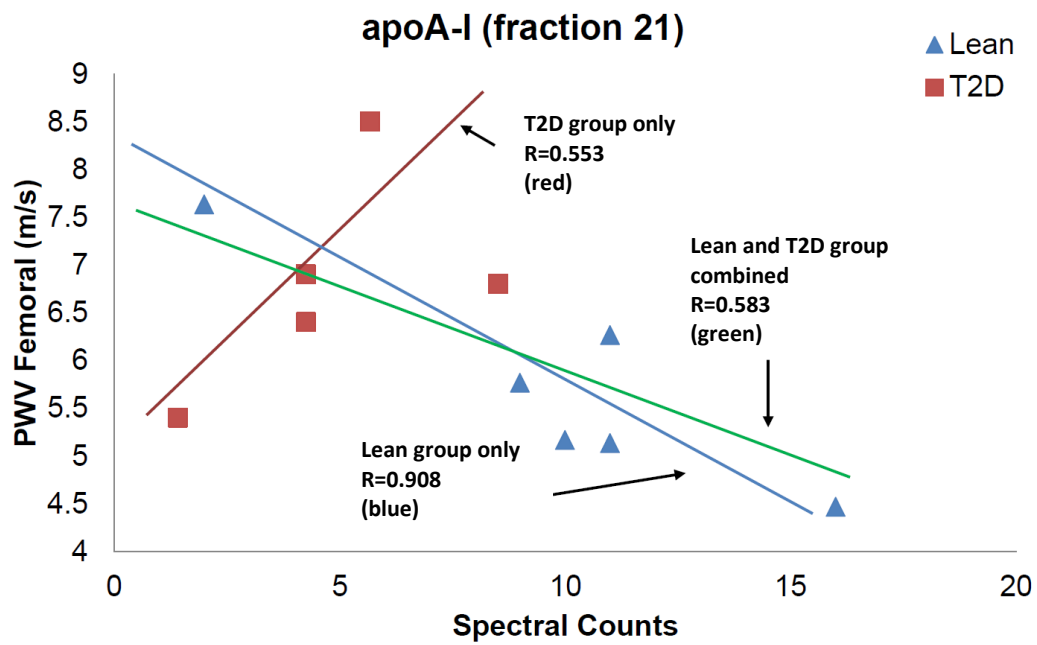

Supplement: f1 [file 7514709.f1.pdf]
